# Supplementary material for: Treatment satisfaction in 5q-spinal muscular atrophy under nusinersen therapy
Source: PubMed Central journal article supplement — Ther Adv Neurol Disord. 2021 Mar 5;14:1756286421998902. doi: 10.1177/1756286421998902 (PMC7940734; doi:10.1177/1756286421998902), 2021-03-05
Supplement: sj-pdf-1-tan-10.1177_1756286421998902.pdf [file sj-pdf-1-tan-10.1177_1756286421998902.pdf]

## Supplementary material

### Treatment satisfaction in 5q-spinal muscular atrophy under nusinersen therapy

Short title ***Treatment satisfaction in 5q-SMA***

Alma Osmanovic, MD<sup>1</sup>; Gresa Ranxha<sup>1</sup>; Mareike Kumpe<sup>1</sup>; Claudia D. Wurster, MD<sup>2</sup>;  
Benjamin Stolte, MD<sup>3</sup>; Isabell Cordts, MD<sup>4</sup>; René Günther, MD<sup>5,6</sup>; Maren Freigang<sup>5</sup>;  
Lars H. Müschen <sup>1</sup>; Camilla Binz, MD<sup>1</sup>; Andreas Hermann, MD, PhD <sup>7</sup>; Marcus  
Deschauer, MD<sup>4</sup>; Paul Lingor, MD<sup>4</sup>; Albert C. Ludolph, MD<sup>2,8</sup>; Tim Hagenacker, MD<sup>3</sup>;  
Olivia Schreiber-Katz, MD<sup>1#</sup>; Susanne Petri, MD<sup>1#</sup>

<sup>1</sup>Department of Neurology, Hannover Medical School, Hannover, Germany

<sup>2</sup>Department of Neurology, Ulm University, Ulm, Germany

<sup>3</sup>Department of Neurology, University Hospital Essen, Essen, Germany

<sup>4</sup>Department of Neurology, Klinikum rechts der Isar der Technischen Universität München, Munich, Germany

<sup>5</sup>Department of Neurology, Technische Universität Dresden, Dresden, Germany

<sup>6</sup>German Center for Neurodegenerative Diseases (DZNE) Dresden, Dresden, Germany

<sup>7</sup>Translational Neurodegeneration Section „Albrecht-Kossel“, Department of Neurology, University Medical Center Rostock, University of Rostock, Rostock, Germany and German Center for Neurodegenerative Diseases (DZNE) Rostock, Rostock, Germany

<sup>8</sup>German Center for Neurodegenerative Diseases (DZNE) Ulm, Ulm, Germany

#These authors contributed equally as senior authors to this work

Correspondence to Dr. Alma Osmanovic, Hannover Medical School, Department of Neurology, Carl-Neuberg-Strasse 1, Hannover, 30625, Germany, Phone +49 511 532 2392, Fax +49 511 532 3115, Email: Osmanovic.Alma@mh-hannover.de

**Supplementary table 1:** Univariate regression results: analysis of relevant clinical features with influence on the TSQM-1.4<sup>©</sup>

dimensions and sum score.

|                              | Global satisfaction |                     | Effectiveness |                    | Side effects |                      | Convenience  |                        | Sum score    |                      |
|------------------------------|---------------------|---------------------|---------------|--------------------|--------------|----------------------|--------------|------------------------|--------------|----------------------|
|                              | P-value             | β [95%-CI]          | P-value       | β [95%-CI]         | P-value      | β [95%-CI]           | P-value      | β [95%-CI]             | P-value      | β [95%-CI]           |
| <b>Age</b>                   | 0.885               | -0.03 [-0.37-0.32]  | 0.653         | -0.08 [-0.42-0.27] | 0.858        | -0.02 [-0.26-0.22]   | <b>0.194</b> | -0.22 [-0.55- 0.11]    | 0.535        | -0.29 [-1.21- 0,63]  |
| <b>Sex, female</b>           | 0.503               | 3.01 [-6.03-12.20]  | 0.208         | 5.78 [-3.28-14.83] | 0.677        | -1.35 [-7.78-5.07]   | 0.471        | -3.25 [-12.18- 5.68]   | 0.659        | 5.46 [-19.04- 29,95] |
| <b>SMA type</b>              | 0.344               | -3.64 [-11.24-3.96] | 0.905         | -0.46 [-8.08-7.16] | 0.459        | -2.01 [-7.36-3.35]   | 0.248        | 4.31 [-3.06- 11.68]    | 0.992        | 0.10 [-20.19- 20,40] |
| <b>SMN2 copy number n=79</b> | 0.294               | -3.25 [-9.37-2.87]  | 0.822         | 0.67 [-5.26-6.61]  | <b>0.082</b> | -3.90 [-8.30-0.50]   | <b>0.032</b> | 6.38 [0.57- 12.19]     | 0.928        | 0.77 [-16.10- 17,64] |
| <b>Age at onset</b>          | 0.282               | 0.35 [-0.29-0.99]   | <b>0.045</b>  | 0.64 [0.01-1.26]   | 0.326        | -0.23 [-0.68-0.23]   | <b>0.138</b> | 0.47 [-0.16- 1.10]     | <b>0.090</b> | 1.26 [-0.24- 3,15]   |
| <b>Disease duration</b>      | 0.479               | -0.12 [-0.46-0.22]  | <b>0.130</b>  | -0.26 [-0.60-0.08] | 0.737        | 0.04 [-0.20-0.28]    | <b>0.037</b> | -0.35 [-0.67- -0.02]   | <b>0.127</b> | -0.70 [-1.61- 0.20]  |
| <b>Ambulatory state</b>      | <b>0.093</b>        | 8.19 [-1.38-17.76]  | <b>0.015</b>  | 11.57 [2.27-20.87] | 0.336        | -3.32 [-10.12-3.49]  | <b>0.003</b> | 14.28 [4.96- 23.60]    | <b>0.005</b> | 36.96 [11.69- 62.23] |
| <b>RULM* n=78</b>            | 0.869               | -0.03 [-0.39-0.33]  | <b>0.137</b>  | 0.27 [-0.09-0.63]  | <b>0.037</b> | -0.27 [-0.52- -0.02] | <b>0.106</b> | 0.28 [-0.06- 0.62]     | 0.406        | 0.41 [-0.57- 1.38]   |
| <b>HFMSE*n=78</b>            | 0.304               | 0.11 [-0.11-0.33]   | <b>0.023</b>  | 0.25 [0.04-0.46]   | <b>0.017</b> | -0.19 [-0.34-0.04]   | <b>0.160</b> | 0.15 [-0.06- 0.36]     | <b>0.083</b> | 0.402 [-0.07- 1.05]  |
| <b>CT-guided LP</b>          | 0.859               | -0.79 [-9.58-8.00]  | 0.962         | 0.21 [-8.61-9.03]  | <b>0.112</b> | 4.93 [-1.17-11.03]   | <b>0.002</b> | -12.88 [-21.04- -4.72] | <b>0.176</b> | -10.63 [-0.19- 0.99] |

CT=computed tomography, HFMSE=Hammersmith Functional Motor Scale Expanded, LP=lumbar puncture, n=number, RULM=Revised Upper Limb Module, SMA=spinal muscular atrophy, SMN2=survival of motor neuron 2, 95%-CI=95% confidence interval, β= beta coefficient (the degree of change in the outcome variable for every 1-unit of change in the variable). \*RULM and HFMSE scores at treatment initiation. p<0.2 marked in bold.
